# Supplementary material for: TrimNN: Characterizing cellular community motifs for studying multicellular topological organization in complex tissues
Source: Research Square preprint supplement (doi:10.21203/rs.3.rs-5584635/v1), 2025-01-16
Supplement: Supplementary file 1 [file d27ba3000d9e2293a5fc876e.xlsx]

## Sheet: Contents
Supplementary Data
Supplementary Data Number	Legend
1	Benchmarking the performance of TrimNN, TrimNN-RGIN, and NSIC on an independent test set for subgraph matching
2	Performance comparison of TrimNN, TrimNN-RGIN, and NSIC in identifying occurrences of CC motifs
3	Performance comparison of TrimNN, TrimNN-RGIN, and NSIC in identifying ranking index of CC motifs
4	Performance comparison of adding positional encoding in TrimNN
5	Comparison the model performances by replacing GIN with GCN and GT
6	Performance comparison of TrimNN trained with full data, half of the training data, and one-quarter of the training data
7	Classification using Logistics Regression with top 29 CC motifs from TrimNN
8	Classification using Random Forest with top 29 CC motifs from TrimNN
9	Classification using Support Vector Machine with top 29 CC motifs from TrimNN
10	The size2, 3, 4 CC motifs with significant Cox p-value in survival curve
11	P value of node occurrence numbers of cellular commmunity among DII and CLR samples in CRC Codex dataset
12	P value of edge occurrence numbers of cellular community among DII and CLR samples in CRC Codex dataset
13	P value of triangle occurrence numbers of cellular community among DII and CLR samples in CRC Codex dataset
14	The occurrence number of top size-4 motifs in CRC Codex cellular community
15	P value of 'CTX-Ex' and 'Microglia' related node occurrence numbers of celluar community in AD eight-month replicate 1 sample
16	P value of 'CTX-Ex' and 'Microglia' related edge occurrence numbers of cellular community in AD eight-month replicate 1 sample
17	P value of 'CTX-Ex' and 'Microglia' related triangle occurrence numbers of cellular community in AD eight-month replicate 1 sample
18	P value of 'CTX-Ex' and 'Microglia' related node occurrence numbers of cellular community in AD eight-month replicate 2 sample
19	P value of 'CTX-Ex' and 'Microglia' related edge occurrence numbers of cellular community in AD eight-month replicate 2 sample
20	P value of 'CTX-Ex' and 'Microglia' related triangle occurrence numbers of cellular community in AD eight-month replicate 2 sample
21	P value of 'CTX-Ex' and 'Microglia' related node occurrence numbers of cellular community in AD thirteen-month replicate 1 sample
22	P value of 'CTX-Ex' and 'Microglia' related edge occurrence numbers of cellular community in AD thirteen-month replicate 1 sample
23	P value of 'CTX-Ex' and 'Microglia' related triangle occurrence numbers of cellular community in AD thirteen-month replicate 1 sample
24	P value of 'CTX-Ex' and 'Microglia' related node occurrence numbers of cellular community in AD thirteen-month replicate 2 sample
25	P value of 'CTX-Ex' and 'Microgliaglia' related edge occurrence numbers of cellular community in AD thirteen-month replicate 2 sample
26	P value of 'CTX-Ex' and 'Microglia' related triangle occurrence numbers of cellular community in AD thirteen-month replicate 2 sample
27	Pathway retrieveing results for differentiable values among CellChat matrices of motif 'CCC' in eight and thirteen-month samples
28	Pathway retrieveing results for differentiable values among CellChat matrices of motif 'CCM' in eight and thirteen-month samples
29	Pathway retrieveing results for differentiable values among CellChat matrices of motif 'CMM' in eight and thirteen-month samples
30	Pathway retrieveing results for differentiable values among CellChat matrices of motif 'MMM' in eight and thirteen-month samples
31	Cell-cell Communication matrix of motif 'CCC' and related 3-hop regions in AD eight-month samples inferred from CellChat using TruncatedMean
32	Cell-cell Communication matrix of motif 'CCM' and related 3-hop regions in AD eight-month samples inferred from CellChat using TruncatedMean
33	Cell-cell Communication matrix of motif 'CMM' and related 3-hop regions in AD eight-month samples inferred from CellChat using TruncatedMean
34	Cell-cell Communication matrix of motif 'MMM' and related 3-hop regions in AD eight-month samples inferred from CellChat using TruncatedMean
35	Cell-cell Communication matrix of motif 'CCC' and related 3-hop regions in AD thirteen-month samples inferred from CellChat using TruncatedMean
36	Cell-cell Communication matrix of motif 'CCM' and related 3-hop regions in AD thirteen-month samples inferred from CellChat using TruncatedMean
37	Cell-cell Communication matrix of motif 'CMM' and related 3-hop regions in AD thirteen-month samples inferred from CellChat using TruncatedMean
38	Cell-cell Communication matrix of motif 'MMM' and related 3-hop regions in AD thirteen-month samples inferred from CellChat using TruncatedMean
39	Differentially Expressed Genes of Motif 'CCC' in AD eight-month samples using DESeq2
40	Differentially Expressed Genes of Motif 'CCM' in AD eight-month samples using DESeq2
41	Differentially Expressed Genes of Motif 'CMM' in AD eight-month samples using DESeq2
42	Differentially Expressed Genes of Motif 'MMM' in AD eight-month samples using DESeq2
43	Differentially Expressed Genes of Motif 'CCC' in AD thirteen-month samples using DESeq2
44	Differentially Expressed Genes of Motif 'CCM' in AD thirteen-month samples using DESeq2
45	Differentially Expressed Genes of Motif 'CMM' in AD thirteen-month samples using DESeq2
46	Differentially Expressed Genes of Motif 'MMM' in AD thirteen-month samples using DESeq2
47	Pathway retrieveing results for differentiable values among CellChat matrices of motif 'CCCM' in eight and thirteen-month samples
48	Pathway retrieveing results for differentiable values among CellChat matrices of motif 'MMMM' in eight and thirteen-month samples
49	Pathway retrieveing results for differentiable values among CellChat matrices of motif 'MMMC' in eight and thirteen-month samples
50	Differentially Expressed Genes of Motif 'CCCM' in AD eight-month samples using DESeq2
51	Differentially Expressed Genes of Motif 'MMMM' in AD eight-month samples using DESeq2
52	Differentially Expressed Genes of Motif MMMC' in AD eight-month samples using DESeq2
53	Differentially Expressed Genes of Motif 'CCCM' in AD thirteen-month samples using DESeq2
54	Differentially Expressed Genes of Motif 'MMMM' in AD thirteen-month samples using DESeq2
55	Differentially Expressed Genes of Motif MMMC' in AD thirteen-month samples using DESeq2
56	Cell-cell Communication matrix of motif 'CCCM' and related 3-hop regions in AD eight-month samples inferred from CellChat using TruncatedMean
57	Cell-cell Communication matrix of motif 'MMMM' and related 3-hop regions in AD eight-month samples inferred from CellChat using TruncatedMean
58	Cell-cell Communication matrix of motif 'MMMC' and related 3-hop regions in AD eight-month samples inferred from CellChat using TruncatedMean
59	Cell-cell Communication matrix of motif 'CCCM' and related 3-hop regions in AD thirteen-month samples inferred from CellChat using TruncatedMean
60	Cell-cell Communication matrix of motif 'MMMM' and related 3-hop regions in AD thirteen-month samples inferred from CellChat using TruncatedMean
61	Cell-cell Communication matrix of motif 'MMMC' and related 3-hop regions in AD thirteen-month samples inferred from CellChat using TruncatedMean
62	P value of edges (size-2 CC motifs) occurrence numbers of cellular community in CRC MIBI-TOF dataset
63	P value of triangles (size-3 CC motifs) containing 'CDeight T-cells' and 'Epithelial' cell types (and all triangles) in CRC MIBI-TOF dataset
64	Proportion test on size-3 and size-4 CC motifs in AD case study

## Sheet: Supplementary Data. 1
Supplementary Data 1: Benchmarking the performance of TrimNN, TrimNN-RGIN, and NSIC on an independent test set for subgraph matching.
		TrimNN				TrimNN-RGIN				NSIC
pattern	graph_node	precision	recall	f1	mcc	precision	recall	f1	mcc	precision	recall	f1	mcc
P_size3_NL16	N16	0.985028	1	0.992457	0.984914	0.987231	0.9896	0.988414	0.976803	0.603577	0.9988	0.752448	0.453558
P_size3_NL16	N32	0.979624	1	0.989707	0.979412	0.874055	0.9716	0.92025	0.836827	0.566094	0.9884	0.719883	0.346575
P_size3_NL32	N16	0.983865	1	0.991867	0.983732	0.934513	0.9932	0.962963	0.925427	0.624056	0.992	0.766141	0.488303
P_size3_NL32	N32	0.994036	1	0.997009	0.994018	0.986667	0.9768	0.981709	0.963648	0.597091	0.9852	0.743547	0.421615
P_size3_NL8	N16	0.981162	1	0.990491	0.980981	0.934526	0.982	0.957675	0.914381	0.561364	0.988	0.715942	0.332347
P_size3_NL8	N32	0.973899	1	0.986777	0.97355	0.881863	0.9316	0.906049	0.808086	0.548373	0.984	0.704266	0.285811
P_size4_NL16	N16	0.994431	1	0.997208	0.994416	0.989286	0.9972	0.993227	0.986432	0.686617	0.9912	0.811262	0.601188
P_size4_NL16	N32	0.986193	1	0.993049	0.986097	0.890608	0.99	0.937678	0.873859	0.608867	0.9888	0.753659	0.452507
P_size4_NL32	N16	0.989707	1	0.994827	0.989654	0.944508	0.994	0.968622	0.936887	0.667564	0.992	0.798069	0.569821
P_size4_NL32	N32	0.99088	0.9996	0.995221	0.990438	0.992656	0.9732	0.982832	0.966186	0.639106	0.9832	0.774661	0.507898
P_size4_NL8	N16	0.976935	0.9996	0.988138	0.976263	0.91793	0.9932	0.954083	0.907456	0.671348	0.9944	0.801548	0.579048
P_size4_NL8	N32	0.971229	0.9992	0.985016	0.970002	0.845242	0.97	0.903334	0.801175	0.618714	0.9892	0.761274	0.473968
P_size5_NL16	N16	0.996403	0.9972	0.996801	0.9936	0.996002	0.9964	0.996201	0.9924	0.723948	0.9976	0.839024	0.666663
P_size5_NL16	N32	0.989269	0.9956	0.992424	0.98482	0.90118	0.9776	0.937836	0.873547	0.613709	0.992	0.758294	0.466833
P_size5_NL32	N16	0.992713	0.9808	0.98672	0.97367	0.956857	0.9936	0.974882	0.9495	0.69969	0.9916	0.820453	0.622789
P_size5_NL32	N32	0.994281	0.9736	0.983832	0.968209	0.99388	0.9744	0.984044	0.968586	0.65855	0.9844	0.789161	0.54545
P_size5_NL8	N16	0.988804	0.9892	0.989002	0.978	0.93649	0.9968	0.965704	0.931133	0.68852	0.9956	0.814064	0.60914
P_size5_NL8	N32	0.982581	0.9928	0.987664	0.975253	0.858692	0.982	0.916216	0.828992	0.625819	0.9928	0.767708	0.492826
P_size6_NL16	N16	0.997207	0.9996	0.998402	0.996803	0.9972	0.9972	0.9972	0.9944	0.776636	0.9972	0.873205	0.740907
P_size6_NL16	N32	0.989695	0.9988	0.994227	0.988442	0.942212	0.9848	0.963035	0.925346	0.659049	0.992	0.791953	0.554807
P_size6_NL32	N16	0.995619	1	0.997805	0.99561	0.962227	0.9884	0.975138	0.949951	0.70538	0.9912	0.824214	0.631352
P_size6_NL32	N32	0.989707	1	0.994827	0.989654	0.996361	0.9856	0.990951	0.982057	0.660453	0.992	0.792966	0.557311
P_size6_NL8	N16	0.988533	1	0.994233	0.988467	0.969602	0.9952	0.982235	0.964336	0.763859	0.9976	0.865221	0.723926
P_size6_NL8	N32	0.978857	1	0.989315	0.978628	0.917941	0.9844	0.95001	0.898759	0.689043	0.9936	0.813759	0.607794
P_size7_NL16	N32	0.992063	1	0.996016	0.992032	0.93407	0.9804	0.956674	0.912323	0.672358	0.9924	0.801616	0.578547
P_size7_NL16	N64	0.989311	0.9996	0.994429	0.988853	0.869361	0.9636	0.914058	0.823653	0.597871	0.9884	0.745063	0.427372
P_size7_NL32	N32	0.984252	1	0.992063	0.984126	0.994337	0.9832	0.988737	0.977661	0.672225	0.9836	0.798636	0.568686
P_size7_NL32	N64	0.973869	0.9988	0.986177	0.972319	0.834029	0.9588	0.892073	0.776741	0.579759	0.9624	0.723609	0.352472
P_size7_NL8	N32	0.978474	1	0.98912	0.978237	0.900914	0.9856	0.941356	0.881101	0.701214	0.9932	0.822049	0.626938
P_size7_NL8	N64	0.97124	0.9996	0.985216	0.970414	0.853451	0.9248	0.887694	0.768691	0.635722	0.9724	0.768817	0.48948
P_size8_NL16	N32	0.963735	0.9992	0.981147	0.962252	0.926763	0.9516	0.939017	0.876715	0.611028	0.984	0.753907	0.451462
P_size8_NL16	N64	0.957055	0.9984	0.977291	0.954491	0.857469	0.9024	0.879361	0.753435	0.555001	0.9788	0.708351	0.300454
P_size8_NL32	N32	0.982704	1	0.991277	0.982552	0.997574	0.9868	0.992158	0.984457	0.664932	0.9708	0.789268	0.542392
P_size8_NL32	N64	0.968605	0.9996	0.983858	0.967696	0.848905	0.9304	0.887786	0.768349	0.569198	0.9476	0.711198	0.308425
P_size8_NL8	N32	0.983865	1	0.991867	0.983732	0.962145	0.976	0.969023	0.937697	0.733294	0.992	0.843251	0.674576
P_size8_NL8	N64	0.980377	0.9992	0.989699	0.979381	0.909871	0.9328	0.921193	0.840667	0.655842	0.9856	0.787598	0.541877
P_size9_NL16	N32	0.967467	0.9992	0.983078	0.96612	0.921379	0.9516	0.936246	0.870869	0.604778	0.972	0.745627	0.423888
P_size9_NL16	N64	0.960739	0.9984	0.979208	0.958337	0.846901	0.9072	0.876014	0.745091	0.543309	0.976	0.69804	0.257288
P_size9_NL32	N32	0.986957	0.9988	0.992843	0.985671	0.993939	0.984	0.988945	0.978049	0.646242	0.9492	0.768957	0.486356
P_size9_NL32	N64	0.978056	0.9984	0.988124	0.976211	0.845166	0.9476	0.893457	0.779748	0.559318	0.9448	0.702663	0.276577
P_size9_NL8	N32	0.990884	1	0.995421	0.990842	0.957315	0.9868	0.971834	0.943248	0.763659	0.9952	0.864189	0.721147
P_size9_NL8	N64	0.981132	0.9984	0.989691	0.979352	0.905896	0.9588	0.931597	0.860669	0.681606	0.9916	0.807887	0.593312

## Sheet: Supplementary Data. 2
Supplementary Data2: Performance comparison of of TrimNN, TrimNN-RGIN, and NSIC in identifying occurrences of CC motifs.
TrimNN
			top5		top10		all
			RMSE	MAE	RMSE	MAE	RMSE	MAE
8 cell type	N64	3order	5.55492	5.42857	4.84424	4.66667	2.23793	1.49167
		4order	11.2128	11.1818	11.2128	11.1818	5.92595	5.54978
		5order	7.15142	7.14286	6.18147	6.10526	2.89683	2.62808
	N128	3order	7.22649	6.88889	6.84238	6.45455	3.21066	2.34167
		4order	17.883	17.8	15.9003	15.7273	6.96717	6.32044
		5order	7.48331	7.42857	6.77845	6.68421	3.00755	2.67919
	N256	triangle	17.8606	17.8	15.1357	14.7273	6.32521	4.575
		4order	29.5663	29.5	27.8442	27.7	8.73495	6.57407
		5order	11.4455	11.2857	11.0849	11	5.00226	4.46344
	N512	triangle	32.9575	32.6	30.4516	30.1	13.8603	10.9583
		4order	53.2203	53.2	40.2164	40.0714	15.9117	13.3418
		5order	28.1922	28	25.5702	25.3333	9.69532	8.66244
16 cell type	N64	3order	7.14143	7	7.14143	7	3.30553	2.90395
		4order	13.3417	13.3333	11.6481	11.6071	8.29072	8.16716
		5order	10.0616	10.0588	10.0616	10.0588	7.11585	6.97647
	N128	3order	11.994	11.8571	11	10.8182	3.89046	3.24921
		4order	25.7099	25.6667	23.7291	23.6429	13.2155	12.8111
		5order	14.3073	14.3	14.3073	14.3	9.46397	9.28519
	N256	3order	16.4317	16.3333	15.0575	14.9091	4.96865	3.54044
		4order	28.686	28.6667	27.9053	27.8824	15.4998	15.1014
		5order	19.0351	19	17.8162	17.75	10.56	10.392
	N512	3order	57.9966	57.2	47.8531	46.6923	13.1882	9.28676
		4order	64.1155	64	60.9475	60.8	29.9497	29.0978
		5order	43.4074	43.4	41.0709	41	22.5681	22.1252
TrimNN-RGIN
			top5		top10		all
			RMSE	MAE	RMSE	MAE	RMSE	MAE
8 cell type	N64	3order	9.1261	9	8.74071	8.6	3.99375	2.95
		4order	12.8374	12.8	11.3277	11.2632	7.37786	7.1393
		5order	9.4406	9.375	7.98274	7.86207	5.199	5.0027
	N128	3order	19.0438	18.6667	15.515	14.8571	8.28855	6.95
		4order	19.9625	19.9	19.9625	19.9	11.4044	10.9565
		5order	21.2226	21.2	20.1817	20.1	9.00009	8.41491
	N256	triangle	24.6414	24.4	22.8553	22.5455	11.9801	10.2174
		4order	30.9192	30.8	28.2794	28.0909	10.2224	8.26543
		5order	25.5441	25.5	24.301	24.2308	12.276	11.5872
	N512	triangle	33.1331	33	30.0083	29.5	16.5819	13.975
		4order	44.4162	44.4	51.183	51.1	18.7467	15.7847
		5order	48.2473	47.8	41.1019	40.2727	15.2927	13.7969
16 cell type	N64	3order	11.8954	11.8333	11.2078	11.1538	6.78276	6.47093
		4order	13.5934	13.4857	12.7128	12.6923	8.88405	8.8017
		5order	11.6103	11.6	10.6482	10.6154	8.43682	8.41
	N128	3order	44.9377	43.4	37.8206	36.2	16.5571	15.3616
		4order	37.7094	37.6	35.6216	35.5	21.6363	21.3025
		5order	27.2397	27.2	25.3007	25.25	18.5017	18.3034
	N256	3order	42.5347	42.4	37.1728	36.7273	11.6355	8.88725
		4order	38.3313	38.1429	36.5171	36.3333	20.7561	20.3856
		5order	37.6776	37.6	33.88	33.7143	21.6934	21.3996
	N512	3order	59.2132	59	55.1525	54.8	17.3028	13.2341
		4order	75.5116	75.4286	74.0918	74	36.5747	35.453
		5order	55.6165	55.6	53.0534	53	32.7273	32.2114
NSIC
			top5		top10		all
			RMSE	MAE	RMSE	MAE	RMSE	MAE
8 cell type	N64	3order	187.837	187.8	182.409	182.3	109.494	95.9917
		4order	63.9449	63.9444	63.9449	63.9444	59.4907	59.4312
		5order	63.9007	63.9	63.9007	63.9	54.3007	54.0224
	N128	3order	186.031	186	180.996	180.9	108.431	94.9
		4order	127.889	127.889	127.069	127.062	113.202	112.915
		5order	128	128	127.534	127.533	104.557	103.822
	N256	triangle	243.425	243.2	231.016	230.545	144.961	132.991
		4order	253.168	253.167	251.51	251.5	148.984	133.961
		5order	250.673	250.667	249.553	249.545	168.628	164.889
	N512	triangle	475.817	475	454.36	453.4	282.161	254.458
		4order	508.801	508.8	506.008	506	296.848	267.7
		5order	506.601	506.6	501.274	501.25	281.762	267.757
16 cell type	N64	3order	192	192	191.455	191.455	182.9	182.834
		4order	63.9944	63.9944	63.9944	63.9944	63.4542	63.4522
		5order	64	64	64	64	63.4676	63.4656
	N128	3order	191.601	191.6	190.732	190.727	179.639	179.512
		4order	127.946	127.945	127.946	127.945	126.694	126.692
		5order	127.972	127.971	127.972	127.971	126.744	126.741
	N256	3order	255.201	255.2	253.805	253.8	166.85	156.855
		4order	256	256	256	256	247.226	247.187
		5order	256	256	255.5	255.5	244.072	244.002
	N512	3order	505.011	505	503.709	503.7	326.83	298.612
		4order	511.125	511.125	511.125	511.125	482.168	481.959
		5order	510.167	510.167	510.167	510.167	476.947	476.664

## Sheet: Supplementary Data. 3
Supplementary Data 3: Performance comparison of TrimNN, TrimNN-RGIN, and NSIC in identifying ranking index of CC motifs.
TrimNN
			top5		top10		all
			RMSE	MAE	RMSE	MAE	RMSE	MAE
8 cell type	N64	3order	26.1616	17.2857	33.3117	25	29.6555	23.3
		4order	122.535	109.091	122.535	109.091	76.4353	57.9351
		5order	116.274	105.125	108.746	92.8276	77.0742	67.3128
	N128	3order	49.3784	42.6667	47.9811	40.5455	37.0575	30.575
		4order	29.7658	22	172.13	118.091	146.424	117.366
		5order	164.985	123	163.12	118.4	163.208	117.349
	N256	triangle	28.4816	27.6	31.3267	27.1818	38.8956	32.3167
		4order	377.609	303.667	339.144	250.4	454.711	375.434
		5order	482.599	411.167	495.818	427.462	317.47	252.13
	N512	triangle	13.2514	11.2	9.64365	7	29.1826	22.2417
		4order	463.826	381.8	336.049	209.214	424.463	343.316
		5order	674.152	495.4	645.886	482.25	469.62	378.109
16 cell type	N64	3order	76.7105	65.3	76.7105	65.3	47.7	34.3729
		4order	156.291	143	162.706	159.821	86.8933	71.2375
		5order	90.8119	90.8	87.476	85.4706	46.8965	35.9412
	N128	3order	163.585	152.286	166.694	159.455	89.0108	69.8265
		4order	328.647	320.336	328.647	320.336	186.41	153.906
		5order	213.004	213.9	210.338	210.312	129.181	118.27
	N256	3order	208.064	175.5	162.007	122.818	261.456	216.786
		4order	668.632	633.333	685.02	666.118	394.157	326.975
		5order	266.951	245	284.193	276.071	149.231	120.436
	N512	3order	235.783	124.2	233.882	122.3	260.167	213.52
		4order	1273.78	1155.8	1271.43	1153.5	775.61	643.158
		5order	813.602	813.6	810.552	810.545	436.748	354.522
TrimNN-RGIN
			top5		top10		all
			RMSE	MAE	RMSE	MAE	RMSE	MAE
8 cell type	N64	3order	10.7637	5.85714	11.9499	7.4	22.7189	19.3333
		4order	129.917	116.4	107.357	85.6842	76.1888	63.5373
		5order	145.143	145.143	123.097	112.421	87.387	70.8895
	N128	3order	31.5806	21	22.6842	14.1429	27.8432	22.4417
		4order	181.302	122.3	181.302	122.3	157.128	132.298
		5order	221.488	171.571	241.681	197.474	171.386	138.613
	N256	triangle	24.771	22	27.0757	21.2727	27.9288	22.2783
		4order	412.705	348.2	395.103	329.818	442.173	362.083
		5order	551.407	472.571	584.976	535.438	321.627	263.619
	N512	triangle	40.8118	35.2	38.3171	30	42.0819	32.8333
		4order	542.558	421.6	475.918	395.9	469.13	378.586
		5order	711.639	576.8	581.688	416.727	446.105	355.571
16 cell type	N64	3order	57.3382	40.3333	64.8578	49.7692	54.8111	44.1221
		4order	171.574	171.571	169.024	169	89.8556	63.6742
		5order	87.476	85.4706	88.4855	88.4615	50.0496	43.35
	N128	3order	177.204	177.2	156.441	140.3	95.2255	78.1964
		4order	336.203	336.2	334.009	334	200.153	177.076
		5order	214.403	214.4	213.904	213.9	131.511	120.308
	N256	3order	227.612	203.4	206.626	157.273	262.517	220.054
		4order	657.247	612	677.034	650.25	413.159	360.394
		5order	298.002	298	295.266	295.25	151.928	124.282
	N512	3order	419.862	365	353.043	291.923	285.33	233.819
		4order	1422.43	1422.43	1420.9	1420.9	808.99	686.248
		5order	813.201	813.2	810.836	810.833	444.059	366.981
NSIC
			top5		top10		all
			RMSE	MAE	RMSE	MAE	RMSE	MAE
8 cell type	N64	3order	37.0756	32.2	46.0945	42.1	42.3635	35.9333
		4order	141.973	139.056	141.973	139.056	83.0157	69.9375
		5order	139.174	135.7	139.174	135.7	93.2479	79.0609
	N128	3order	50.8213	36.8	54.604	45.6	42.1098	34.5333
		4order	273.28	263.889	248.223	219.5	153.213	124.85
		5order	333	333	329.291	329.267	186.527	154.727
	N256	triangle	80.6598	70	72.8897	65.8182	43.8948	35.8496
		4order	524.17	524.167	470.41	437.8	496.221	409.278
		5order	595.909	558.667	588.202	547.818	338.201	280.537
	N512	triangle	60.9344	47	51.001	37.1	35.1879	27.3083
		4order	596.458	536.4	570.661	487.5	453.653	366.189
		5order	743.414	655	610.661	483.75	486.498	397.067
16 cell type	N64	3order	99	99	96.3049	96.2727	56.2674	46.457
		4order	172.511	172.034	172.511	172.034	117.042	81.2946
		5order	92	92	92	92	62.8447	44.9735
	N128	3order	142.355	127.8	133.624	114.364	94.4895	78.1415
		4order	335.67	335.667	333.081	333.071	198.409	155.534
		5order	213.022	211.086	213.022	211.086	134.151	116.019
	N256	3order	294.313	270.4	291.807	267.7	279.303	233.822
		4order	712	712	712	712	415.233	359.757
		5order	300	300	296.027	296	157.126	134.119
	N512	3order	342.775	298.833	333.582	292.9	295.609	237.636
		4order	1330.38	1255	1330.38	1255	802.973	677.791
		5order	813.334	813.333	813.334	813.333	453.434	378.494

## Sheet: Supplementary Data. 4
Supplementary Data 4: Performance comparison of adding positional encoding in TrimNN.
		RGIN+PE+Linear				RGIN+Linear				RGIN+GRU				RGIN+PE+GRU
pattern	graph_node	precision	recall	f1	mcc	precision	recall	f1	mcc	precision	recall	f1	mcc	precision	recall	f1	mcc
P_size3_NL16	N16	0.985028	1	0.992457	0.984914	0.992829	0.9968	0.99481	0.989608	0.987231	0.9896	0.988414	0.976803	0.9992	0.9992	0.9992	0.9984
P_size3_NL16	N32	0.979624	1	0.989707	0.979412	0.976881	0.9972	0.986936	0.973811	0.874055	0.9716	0.92025	0.836827	0.981518	0.9984	0.989887	0.979745
P_size3_NL32	N16	0.983865	1	0.991867	0.983732	0.985978	0.9844	0.985188	0.970401	0.934513	0.9932	0.962963	0.925427	0.989303	0.9988	0.994029	0.988046
P_size3_NL32	N32	0.994036	1	0.997009	0.994018	0.991512	0.9812	0.986329	0.972853	0.986667	0.9768	0.981709	0.963648	0.99601	0.9984	0.997203	0.994403
P_size3_NL8	N16	0.981162	1	0.990491	0.980981	0.9758	1	0.987752	0.9755	0.934526	0.982	0.957675	0.914381	0.990095	0.9996	0.994825	0.989646
P_size3_NL8	N32	0.973899	1	0.986777	0.97355	0.966731	0.9996	0.982891	0.965758	0.881863	0.9316	0.906049	0.808086	0.983084	0.9996	0.991273	0.982539
P_size4_NL16	N16	0.994431	1	0.997208	0.994416	0.993246	1	0.996612	0.993223	0.989286	0.9972	0.993227	0.986432	0.998801	0.9996	0.9992	0.9984
P_size4_NL16	N32	0.986193	1	0.993049	0.986097	0.981897	0.998	0.989883	0.979732	0.890608	0.99	0.937678	0.873859	0.987747	0.9996	0.993638	0.987271
P_size4_NL32	N16	0.989707	1	0.994827	0.989654	0.990373	0.9876	0.988985	0.978004	0.944508	0.994	0.968622	0.936887	0.993618	0.9964	0.995007	0.990004
P_size4_NL32	N32	0.99088	0.9996	0.995221	0.990438	0.989771	0.9676	0.97856	0.95784	0.992656	0.9732	0.982832	0.966186	0.998797	0.9964	0.997597	0.995203
P_size4_NL8	N16	0.976935	0.9996	0.988138	0.976263	0.9777	0.9996	0.988528	0.977045	0.91793	0.9932	0.954083	0.907456	0.980392	1	0.990099	0.980196
P_size4_NL8	N32	0.971229	0.9992	0.985016	0.970002	0.970485	0.9996	0.984828	0.969636	0.845242	0.97	0.903334	0.801175	0.969697	0.9984	0.983839	0.967624
P_size5_NL16	N16	0.996403	0.9972	0.996801	0.9936	0.997977	0.9868	0.992357	0.984862	0.996404	0.9976	0.997002	0.994001	1	1	1	1
P_size5_NL16	N32	0.989269	0.9956	0.992424	0.98482	0.991942	0.9848	0.988358	0.976825	0.920906	0.992	0.955132	0.909514	0.984196	0.9964	0.99026	0.980475
P_size5_NL32	N16	0.989662	0.9956	0.992622	0.985218	0.992998	0.9644	0.97849	0.957997	0.956857	0.9936	0.974882	0.9495	0.995968	0.988	0.991968	0.984031
P_size5_NL32	N32	0.994411	0.9964	0.995405	0.990802	0.99627	0.9616	0.978628	0.958581	0.99388	0.9744	0.984044	0.968586	0.997971	0.9836	0.990733	0.981702
P_size5_NL8	N16	0.985265	0.9896	0.987428	0.974809	0.987164	0.9844	0.98578	0.971604	0.93649	0.9968	0.965704	0.931133	0.986171	0.9984	0.992248	0.984476
P_size5_NL8	N32	0.97869	0.992	0.9853	0.97049	0.980907	0.9864	0.983646	0.967215	0.858692	0.982	0.916216	0.828992	0.974941	0.996	0.985358	0.970626
P_size6_NL16	N16	0.997207	0.9996	0.998402	0.996803	0.998401	0.9992	0.9988	0.9976	0.9972	0.9972	0.9972	0.9944	1	1	1	1
P_size6_NL16	N32	0.989695	0.9988	0.994227	0.988442	0.988124	0.9984	0.993235	0.986453	0.942212	0.9848	0.963035	0.925346	0.989637	0.9932	0.991415	0.982806
P_size6_NL32	N16	0.995619	1	0.997805	0.99561	0.99273	0.9832	0.987942	0.976045	0.962227	0.9884	0.975138	0.949951	0.994364	0.988	0.991172	0.98242
P_size6_NL32	N32	0.989707	1	0.994827	0.989654	0.987216	0.9576	0.972183	0.945626	0.996361	0.9856	0.990951	0.982057	0.997996	0.996	0.996997	0.994002
P_size6_NL8	N16	0.988533	1	0.994233	0.988467	0.989315	1	0.994629	0.989258	0.969602	0.9952	0.982235	0.964336	0.99088	0.9996	0.995221	0.990438
P_size6_NL8	N32	0.978857	1	0.989315	0.978628	0.981518	0.9984	0.989887	0.979745	0.917941	0.9844	0.95001	0.898759	0.983858	0.9996	0.991667	0.983326
P_size7_NL16	N32	0.992063	1	0.996016	0.992032	0.990457	0.9964	0.99342	0.986818	0.93407	0.9804	0.956674	0.912323	0.98615	0.9968	0.991446	0.982857
P_size7_NL16	N64	0.989311	0.9996	0.994429	0.988853	0.987251	0.9912	0.989222	0.978408	0.869361	0.9636	0.914058	0.823653	0.988091	0.9956	0.991831	0.983628
P_size7_NL32	N32	0.984252	1	0.992063	0.984126	0.993339	0.4772	0.644691	0.554769	0.994337	0.9832	0.988737	0.977661	0.998385	0.9892	0.993771	0.987642
P_size7_NL32	N64	0.973869	0.9988	0.986177	0.972319	0.951941	0.412	0.575098	0.474999	0.834029	0.9588	0.892073	0.776741	0.964869	0.9448	0.954729	0.910597
P_size7_NL8	N32	0.978474	1	0.98912	0.978237	0.978824	0.9984	0.988515	0.976995	0.900914	0.9856	0.941356	0.881101	0.979224	0.9992	0.989111	0.978204
P_size7_NL8	N64	0.97124	0.9996	0.985216	0.970414	0.973458	0.9976	0.985381	0.970699	0.853451	0.9248	0.887694	0.768691	0.973479	0.9984	0.985782	0.971518
P_size8_NL16	N32	0.963735	0.9992	0.981147	0.962252	0.954922	0.4152	0.578757	0.479542	0.926763	0.9516	0.939017	0.876715	0.985595	0.8484	0.911866	0.844219
P_size8_NL16	N64	0.957055	0.9984	0.977291	0.954491	0.934375	0.3588	0.518497	0.423487	0.857469	0.9024	0.879361	0.753435	0.969591	0.778	0.863293	0.768758
P_size8_NL32	N32	0.982704	1	0.991277	0.982552	0.958633	0.4264	0.590255	0.490552	0.997574	0.9868	0.992158	0.984457	0.999183	0.978	0.988478	0.97742
P_size8_NL32	N64	0.968605	0.9996	0.983858	0.967696	0.895914	0.3684	0.522109	0.402831	0.848905	0.9304	0.887786	0.768349	0.962979	0.874	0.916335	0.844011
P_size8_NL8	N32	0.983865	1	0.991867	0.983732	0.986182	0.9992	0.992649	0.985286	0.962145	0.976	0.969023	0.937697	0.989307	0.9992	0.994229	0.988449
P_size8_NL8	N64	0.980377	0.9992	0.989699	0.979381	0.980377	0.9992	0.989699	0.979381	0.909871	0.9328	0.921193	0.840667	0.979536	0.9956	0.987502	0.974931
P_size9_NL16	N32	0.967467	0.9992	0.983078	0.96612	0.943571	0.408	0.569673	0.465927	0.921379	0.9516	0.936246	0.870869	0.979881	0.8572	0.914444	0.846259
P_size9_NL16	N64	0.960739	0.9984	0.979208	0.958337	0.872267	0.3032	0.449985	0.341481	0.846901	0.9072	0.876014	0.745091	0.965247	0.7888	0.868149	0.773432
P_size9_NL32	N32	0.986957	0.9988	0.992843	0.985671	0.975213	0.5036	0.664205	0.560729	0.993939	0.984	0.988945	0.978049	1	0.9796	0.989695	0.979804
P_size9_NL32	N64	0.978056	0.9984	0.988124	0.976211	0.914062	0.4212	0.57667	0.453111	0.845166	0.9476	0.893457	0.779748	0.967756	0.9124	0.939263	0.883446
P_size9_NL8	N32	0.990884	1	0.995421	0.990842	0.993638	0.9996	0.99661	0.993218	0.957315	0.9868	0.971834	0.943248	0.993241	0.9992	0.996211	0.992418
P_size9_NL8	N64	0.981132	0.9984	0.989691	0.979352	0.983064	0.9984	0.990673	0.981319	0.905896	0.9588	0.931597	0.860669	0.980384	0.9996	0.989899	0.979788

## Sheet: Supplementary Data. 5
Supplementary Data 5: Comparison the model performances by replacing GIN with GCN and GT.
		TrimNN				GCN(Graph Convolution Network)				GT(Graph Transformer)
pattern	graph_node	precision	recall	f1	mcc	precision	recall	f1	mcc	precision	recall	f1	mcc
P_size3_NL16	N16	0.985028	1	0.992457	0.984914	0.997992	0.994	0.995992	0.992008	1	0.8428	0.914695	0.853411
P_size3_NL16	N32	0.979624	1	0.989707	0.979412	0.980617	0.9916	0.986078	0.972061	0.996092	0.8156	0.896855	0.826075
P_size3_NL32	N16	0.983865	1	0.991867	0.983732	0.98985	0.9752	0.98247	0.965306	0.998501	0.7992	0.887803	0.814388
P_size3_NL32	N32	0.994036	1	0.997009	0.994018	0.999175	0.9684	0.983547	0.968059	1	0.7128	0.832321	0.744151
P_size3_NL8	N16	0.981162	1	0.990491	0.980981	0.983071	0.9988	0.990873	0.981726	0.996797	0.7468	0.853876	0.768977
P_size3_NL8	N32	0.973899	1	0.986777	0.97355	0.976069	0.9952	0.985542	0.970987	0.991402	0.738	0.846136	0.756737
P_size4_NL16	N16	0.994431	1	0.997208	0.994416	0.9976	0.9976	0.9976	0.9952	0.997907	0.9536	0.975251	0.952539
P_size4_NL16	N32	0.986193	1	0.993049	0.986097	0.981102	0.9968	0.988889	0.977725	0.994401	0.9236	0.957694	0.920737
P_size4_NL32	N16	0.989707	1	0.994827	0.989654	0.987185	0.986	0.986592	0.973201	0.999075	0.8644	0.926871	0.871555
P_size4_NL32	N32	0.99088	0.9996	0.995221	0.990438	0.998781	0.9832	0.990929	0.98212	0.99899	0.7916	0.883285	0.808412
P_size4_NL8	N16	0.976935	0.9996	0.988138	0.976263	0.978082	0.9996	0.988724	0.977437	0.989252	0.9204	0.953585	0.912613
P_size4_NL8	N32	0.971229	0.9992	0.985016	0.970002	0.960648	0.996	0.978005	0.955847	0.984767	0.8792	0.928994	0.870617
P_size5_NL16	N16	0.996403	0.9972	0.996801	0.9936	1	0.9992	0.9996	0.9992	0.998345	0.9652	0.981493	0.964131
P_size5_NL16	N32	0.989269	0.9956	0.992424	0.98482	0.976872	0.9968	0.986735	0.973403	0.996201	0.944	0.969398	0.941694
P_size5_NL32	N16	0.989662	0.9956	0.992622	0.985218	0.98923	0.992	0.990613	0.981204	0.994753	0.91	0.950491	0.908503
P_size5_NL32	N32	0.994411	0.9964	0.995405	0.990802	0.99797	0.9832	0.99053	0.981307	0.998664	0.8968	0.944995	0.900296
P_size5_NL8	N16	0.985265	0.9896	0.987428	0.974809	0.978648	0.99	0.984291	0.968465	0.990221	0.9316	0.960016	0.924021
P_size5_NL8	N32	0.97869	0.992	0.9853	0.97049	0.971026	0.992	0.981401	0.962625	0.978426	0.9252	0.951069	0.906142
P_size6_NL16	N16	0.997207	0.9996	0.998402	0.996803	0.999199	0.9984	0.9988	0.9976	0.999585	0.964	0.98147	0.964211
P_size6_NL16	N32	0.989695	0.9988	0.994227	0.988442	0.982057	0.9852	0.983626	0.967205	0.993978	0.9244	0.957927	0.921059
P_size6_NL32	N16	0.995619	1	0.997805	0.99561	0.992739	0.9844	0.988552	0.977234	0.996798	0.8716	0.930004	0.875735
P_size6_NL32	N32	0.989707	1	0.994827	0.989654	0.998371	0.9808	0.989508	0.979352	0.999492	0.7868	0.880483	0.804834
P_size6_NL8	N16	0.988533	1	0.994233	0.988467	0.987357	0.9996	0.993441	0.986876	0.995019	0.9588	0.976574	0.954633
P_size6_NL8	N32	0.978857	1	0.989315	0.978628	0.972581	0.9932	0.982783	0.965417	0.990618	0.9292	0.958927	0.922174
P_size7_NL16	N32	0.992063	1	0.996016	0.992032	0.979125	0.9756	0.977359	0.954806	0.994935	0.9428	0.968166	0.93929
P_size7_NL16	N64	0.989311	0.9996	0.994429	0.988853	0.966407	0.9436	0.954867	0.911054	0.987094	0.8872	0.934485	0.880118
P_size7_NL32	N32	0.984252	1	0.992063	0.984126	1	0.9696	0.984565	0.970048	0.998258	0.6876	0.814306	0.722264
P_size7_NL32	N64	0.973869	0.9988	0.986177	0.972319	0.941513	0.8564	0.896942	0.806502	0.972678	0.6408	0.772607	0.66256
P_size7_NL8	N32	0.978474	1	0.98912	0.978237	0.980253	0.9928	0.986486	0.97288	0.990112	0.9212	0.954414	0.914217
P_size7_NL8	N64	0.97124	0.9996	0.985216	0.970414	0.972078	0.9748	0.973437	0.946804	0.983798	0.8744	0.925879	0.865367
P_size8_NL16	N32	0.963735	0.9992	0.981147	0.962252	0.974731	0.8332	0.898426	0.820293	0.976148	0.6548	0.783816	0.676508
P_size8_NL16	N64	0.957055	0.9984	0.977291	0.954491	0.935556	0.6736	0.783256	0.653333	0.955812	0.5624	0.708134	0.588568
P_size8_NL32	N32	0.982704	1	0.991277	0.982552	0.996737	0.9776	0.987076	0.97458	0.994385	0.7792	0.873739	0.793605
P_size8_NL32	N64	0.968605	0.9996	0.983858	0.967696	0.924255	0.8688	0.89567	0.79904	0.972118	0.7252	0.830699	0.728285
P_size8_NL8	N32	0.983865	1	0.991867	0.983732	0.984903	0.9916	0.98824	0.976423	0.995677	0.9212	0.956991	0.919777
P_size8_NL8	N64	0.980377	0.9992	0.989699	0.979381	0.976133	0.9652	0.970636	0.941659	0.992259	0.8716	0.928024	0.871265
P_size9_NL16	N32	0.967467	0.9992	0.983078	0.96612	0.956087	0.8796	0.91625	0.841898	0.977317	0.6032	0.745981	0.637779
P_size9_NL16	N64	0.960739	0.9984	0.979208	0.958337	0.90197	0.7508	0.819472	0.678802	0.952667	0.5072	0.661968	0.545286
P_size9_NL32	N32	0.986957	0.9988	0.992843	0.985671	1	0.9652	0.982292	0.965785	0.997319	0.5952	0.745491	0.648664
P_size9_NL32	N64	0.978056	0.9984	0.988124	0.976211	0.9426	0.7948	0.862413	0.755748	0.979735	0.5028	0.664552	0.563701
P_size9_NL8	N32	0.990884	1	0.995421	0.990842	0.990744	0.9848	0.987763	0.975618	0.99678	0.8668	0.927257	0.871441
P_size9_NL8	N64	0.981132	0.9984	0.989691	0.979352	0.981194	0.96	0.970481	0.94182	0.992828	0.7752	0.87062	0.788783

## Sheet: Supplementary Data. 6
Supplementary Data 6: Performance comparison of TrimNN trained with full data, half of the training data, and one-quarter of the training data.
		TrimNN(full training data)				Half of the training data				One-fourth of the traing data
pattern	graph_node	precision	recall	f1	mcc	precision	recall	f1	mcc	precision	recall	f1	mcc
P_size3_NL16	N16	0.985028	1	0.992457	0.984914	0.948767	1	0.97371	0.947382	0.939496	1	0.968804	0.937546
P_size3_NL16	N32	0.979624	1	0.989707	0.979412	0.932013	0.998	0.963879	0.927528	0.908297	0.9984	0.95122	0.902049
P_size3_NL32	N16	0.983865	1	0.991867	0.983732	0.932836	1	0.965251	0.930415	0.925583	1	0.961354	0.922587
P_size3_NL32	N32	0.994036	1	0.997009	0.994018	0.940181	0.9996	0.96898	0.937875	0.925871	0.9992	0.961139	0.922097
P_size3_NL8	N16	0.981162	1	0.990491	0.980981	0.9081	1	0.951837	0.903438	0.905072	0.9992	0.94981	0.899277
P_size3_NL8	N32	0.973899	1	0.986777	0.97355	0.905989	0.9984	0.949952	0.899491	0.905263	0.9976	0.949191	0.897883
P_size4_NL16	N16	0.994431	1	0.997208	0.994416	0.961908	1	0.980584	0.961154	0.956389	1	0.977708	0.955394
P_size4_NL16	N32	0.986193	1	0.993049	0.986097	0.931767	0.9996	0.964492	0.928865	0.920471	1	0.958589	0.917029
P_size4_NL32	N16	0.989707	1	0.994827	0.989654	0.930752	1	0.964134	0.928172	0.929661	0.9992	0.963177	0.926195
P_size4_NL32	N32	0.99088	0.9996	0.995221	0.990438	0.938768	0.9996	0.968229	0.936368	0.935279	1	0.966557	0.933037
P_size4_NL8	N16	0.976935	0.9996	0.988138	0.976263	0.919456	1	0.958038	0.915921	0.916056	0.9996	0.956006	0.9118
P_size4_NL8	N32	0.971229	0.9992	0.985016	0.970002	0.905332	0.9984	0.949591	0.898762	0.894341	0.9988	0.943689	0.88687
P_size5_NL16	N16	0.996403	0.9972	0.996801	0.9936	0.972973	0.9936	0.983178	0.966217	0.967213	0.9912	0.97906	0.957895
P_size5_NL16	N32	0.989269	0.9956	0.992424	0.98482	0.932254	0.9908	0.960636	0.920617	0.907817	0.9848	0.944743	0.887999
P_size5_NL32	N16	0.989662	0.9956	0.992622	0.985218	0.963883	0.9928	0.978128	0.95603	0.938219	0.978	0.957697	0.914422
P_size5_NL32	N32	0.994411	0.9964	0.995405	0.990802	0.968442	0.982	0.975174	0.950093	0.931925	0.9528	0.942247	0.883422
P_size5_NL8	N16	0.985265	0.9896	0.987428	0.974809	0.95	0.988	0.968627	0.93675	0.926682	0.9808	0.952973	0.904744
P_size5_NL8	N32	0.97869	0.992	0.9853	0.97049	0.931125	0.9896	0.959473	0.918212	0.903332	0.9868	0.943223	0.884986
P_size6_NL16	N16	0.997207	0.9996	0.998402	0.996803	0.972763	1	0.986193	0.972381	0.960799	1	0.980008	0.959999
P_size6_NL16	N32	0.989695	0.9988	0.994227	0.988442	0.938415	0.9996	0.968042	0.935992	0.920471	1	0.958589	0.917029
P_size6_NL32	N16	0.995619	1	0.997805	0.99561	0.942685	1	0.970497	0.940941	0.942329	1	0.970309	0.940563
P_size6_NL32	N32	0.989707	1	0.994827	0.989654	0.941243	0.9996	0.969544	0.939007	0.932836	1	0.965251	0.930415
P_size6_NL8	N16	0.988533	1	0.994233	0.988467	0.958557	0.9992	0.978457	0.95686	0.957471	0.9996	0.978082	0.956126
P_size6_NL8	N32	0.978857	1	0.989315	0.978628	0.94162	1	0.969932	0.939808	0.933782	0.9984	0.965011	0.929829
P_size7_NL16	N32	0.992063	1	0.996016	0.992032	0.937383	1	0.96768	0.935289	0.926612	1	0.961908	0.923702
P_size7_NL16	N64	0.989311	0.9996	0.994429	0.988853	0.91878	1	0.957671	0.915183	0.903797	0.9996	0.949288	0.898261
P_size7_NL32	N32	0.984252	1	0.992063	0.984126	0.894944	0.9984	0.943846	0.887148	0.883894	0.9988	0.93784	0.875025
P_size7_NL32	N64	0.973869	0.9988	0.986177	0.972319	0.84618	0.9968	0.915335	0.828836	0.802505	0.9996	0.890274	0.777411
P_size7_NL8	N32	0.978474	1	0.98912	0.978237	0.94304	1	0.970685	0.941319	0.929023	1	0.963206	0.926307
P_size7_NL8	N64	0.97124	0.9996	0.985216	0.970414	0.927246	0.9992	0.961879	0.923585	0.914014	0.9992	0.95471	0.909157
P_size8_NL16	N32	0.963735	0.9992	0.981147	0.962252	0.828859	0.988	0.90146	0.798863	0.79573	0.9988	0.885775	0.767824
P_size8_NL16	N64	0.957055	0.9984	0.977291	0.954491	0.811796	0.98	0.888003	0.769499	0.764059	1	0.866251	0.726717
P_size8_NL32	N32	0.982704	1	0.991277	0.982552	0.868659	1	0.929714	0.858672	0.868944	0.9972	0.928665	0.856178
P_size8_NL32	N64	0.968605	0.9996	0.983858	0.967696	0.824695	0.9992	0.903599	0.805029	0.802003	0.9932	0.88742	0.770207
P_size8_NL8	N32	0.983865	1	0.991867	0.983732	0.947289	0.9992	0.972552	0.94502	0.941909	0.9988	0.96952	0.938914
P_size8_NL8	N64	0.980377	0.9992	0.989699	0.979381	0.940512	0.9992	0.968968	0.937828	0.927935	0.9992	0.96225	0.92433
P_size9_NL16	N32	0.967467	0.9992	0.983078	0.96612	0.827795	0.9864	0.900164	0.795946	0.792513	0.9992	0.883935	0.764041
P_size9_NL16	N64	0.960739	0.9984	0.979208	0.958337	0.786822	0.9744	0.870622	0.731491	0.74183	0.9988	0.851347	0.694179
P_size9_NL32	N32	0.986957	0.9988	0.992843	0.985671	0.859552	0.9988	0.923959	0.846785	0.849485	0.9888	0.913863	0.824767
P_size9_NL32	N64	0.978056	0.9984	0.988124	0.976211	0.82069	0.9996	0.901353	0.800452	0.778129	0.9848	0.86935	0.730227
P_size9_NL8	N32	0.990884	1	0.995421	0.990842	0.968229	0.9996	0.983665	0.967308	0.957854	1	0.978474	0.956927
P_size9_NL8	N64	0.981132	0.9984	0.989691	0.979352	0.938768	0.9996	0.968229	0.936368	0.927988	1	0.962649	0.92519

## Sheet: Supplementary Data. 7
Supplementary Data. 7:Classification using Logistics Regression with top 29 CC motifs from TrimNN
size-1
	all	top5	top10	top30	top50	top100
accuracy	0.725	0.646429	0.658571	0.725	0.725	0.725
precision	0.72353	0.635115	0.655242	0.72353	0.72353	0.72353
recall	0.771905	0.741316	0.733847	0.771905	0.771905	0.771905
f1	0.732909	0.669998	0.6749	0.732909	0.732909	0.732909
mcc	0.454876	0.302044	0.327971	0.454876	0.454876	0.454876
roc_auc	0.772166	0.696867	0.724468	0.772166	0.772166	0.772166
pr_auc	0.745393	0.683129	0.704462	0.745393	0.745393	0.745393
size-2
	all	top5	top10	top30	top50	top100
accuracy	0.739286	0.734286	0.715714	0.706429	0.695714	0.727857
precision	0.744182	0.719873	0.705108	0.702762	0.695873	0.725795
recall	0.754065	0.81721	0.777685	0.753737	0.736541	0.759922
f1	0.736957	0.750674	0.725789	0.713154	0.701485	0.727794
mcc	0.474613	0.479671	0.43394	0.416174	0.394034	0.45654
roc_auc	0.780672	0.755675	0.76019	0.76033	0.755959	0.779553
pr_auc	0.757246	0.730951	0.734874	0.740654	0.731599	0.759512
size-3
	all	top5	top10	top30	top50	top100
accuracy	0.755714	0.695714	0.689286	0.726429	0.738571	0.74
precision	0.765461	0.681847	0.687308	0.73301	0.736938	0.73549
recall	0.76254	0.779697	0.727944	0.739741	0.763218	0.761747
f1	0.750918	0.713361	0.692154	0.721714	0.736501	0.737503
mcc	0.50752	0.400352	0.386368	0.456247	0.477638	0.476652
roc_auc	0.796104	0.746003	0.774343	0.795916	0.794445	0.80969
pr_auc	0.759679	0.73728	0.762981	0.763451	0.767229	0.785044

## Sheet: Supplementary Data. 8
Supplementary Data. 8: Classification using Random Forest with top 29 CC motifs from TrimNN
size-1
	all	top5	top10	top30	top50	top100
accuracy	0.722857	0.593571	0.648571	0.722857	0.722857	0.722857
precision	0.719815	0.600161	0.642878	0.719815	0.719815	0.719815
recall	0.786401	0.669514	0.71552	0.786401	0.786401	0.786401
f1	0.736589	0.614464	0.660434	0.736589	0.736589	0.736589
mcc	0.451308	0.200457	0.307997	0.451308	0.451308	0.451308
roc_auc	0.781726	0.650884	0.700257	0.781726	0.781726	0.781726
pr_auc	0.755261	0.646201	0.701703	0.755261	0.755261	0.755261
size-2
	all	top5	top10	top30	top50	top100
accuracy	0.735	0.649286	0.703571	0.704286	0.725	0.752143
precision	0.726164	0.654895	0.687545	0.695621	0.712176	0.737338
recall	0.79168	0.719403	0.810501	0.768874	0.804167	0.815561
f1	0.742855	0.669755	0.729221	0.716232	0.739767	0.760869
mcc	0.474151	0.307333	0.41916	0.412802	0.462316	0.509915
roc_auc	0.794137	0.684629	0.735531	0.772091	0.789955	0.797898
pr_auc	0.762769	0.695689	0.691247	0.740923	0.767949	0.764165
size-3
	all	top5	top10	top30	top50	top100
accuracy	0.729286	0.672857	0.675714	0.712143	0.715714	0.720714
precision	0.720404	0.679532	0.664587	0.692031	0.702323	0.70992
recall	0.78981	0.702888	0.756477	0.810069	0.793723	0.800611
f1	0.740199	0.673972	0.693148	0.73266	0.72992	0.73646
mcc	0.461058	0.355472	0.3601	0.431939	0.442869	0.453498
roc_auc	0.784319	0.718393	0.729362	0.767315	0.782109	0.780615
pr_auc	0.765791	0.707304	0.711724	0.756441	0.759637	0.753561

## Sheet: Supplementary Data. 9
Supplementary Data. 9: Classification using Support Vector Machine with top 29 CC motifs from TrimNN
size-1
	all	top5	top10	top30	top50	top100
accuracy	0.72	0.681429	0.682857	0.721429	0.720714	0.72
precision	0.720673	0.676369	0.685244	0.722496	0.722189	0.721715
recall	0.759575	0.751388	0.720788	0.759079	0.759079	0.761813
f1	0.726336	0.69722	0.688537	0.726769	0.726763	0.726864
mcc	0.438252	0.369599	0.371544	0.442055	0.439397	0.441527
roc_auc	0.783733	0.723042	0.760768	0.783733	0.783733	0.783733
pr_auc	0.75541	0.710247	0.76025	0.755418	0.755418	0.75541
size-2
	all	top5	top10	top30	top50	top100
accuracy	0.763571	0.742143	0.725	0.755714	0.762857	0.764286
precision	0.756324	0.716122	0.714504	0.742097	0.750402	0.756101
recall	0.80277	0.844184	0.788234	0.815559	0.815884	0.807468
f1	0.768143	0.762232	0.735927	0.766728	0.771395	0.769098
mcc	0.525916	0.492795	0.452268	0.511421	0.52576	0.531289
roc_auc	0.820034	0.752673	0.788938	0.829822	0.835953	0.83571
pr_auc	0.792683	0.73278	0.77442	0.808558	0.822873	0.815983
size-3
	all	top5	top10	top30	top50	top100
accuracy	0.736429	0.706429	0.721429	0.758571	0.766429	0.757857
precision	0.746575	0.698076	0.71297	0.743951	0.744245	0.739345
recall	0.751462	0.757946	0.766906	0.815692	0.835335	0.828141
f1	0.732673	0.713616	0.725887	0.767053	0.775759	0.769189
mcc	0.479611	0.418368	0.447018	0.519181	0.536596	0.517621
roc_auc	0.807296	0.741493	0.767974	0.818399	0.828399	0.834628
pr_auc	0.775913	0.725982	0.740032	0.7975	0.801811	0.815766

[truncated: 55 more sheets: Supplementary Data. 10, Supplementary Data. 11, Supplementary Data. 12, Supplementary Data. 13, Supplementary Data. 14, Supplementary Data.15, Supplementary Data. 16, Supplementary Data. 17, Supplementary Data. 18, Supplementary Data. 19, Supplementary Data. 20, Supplementary Data. 21, Supplementary Data. 22, Supplementary Data. 23, Supplementary Data. 24, Supplementary Data. 25, Supplementary Data. 26, Supplementary Data. 27, Supplementary Data. 28, Supplementary Data. 29 …]
